# Supplementary material for: Prime-Boost Vaccination With Covaxin/BBV152 Induces Heightened Systemic Cytokine and Chemokine Responses
Source: PubMed Central journal article supplement (PMC8554328; doi:10.3389/fimmu.2021.752397), 2021-10-15

# Sup. Fig. 1A: Month 0 : Nab vs Immune markers

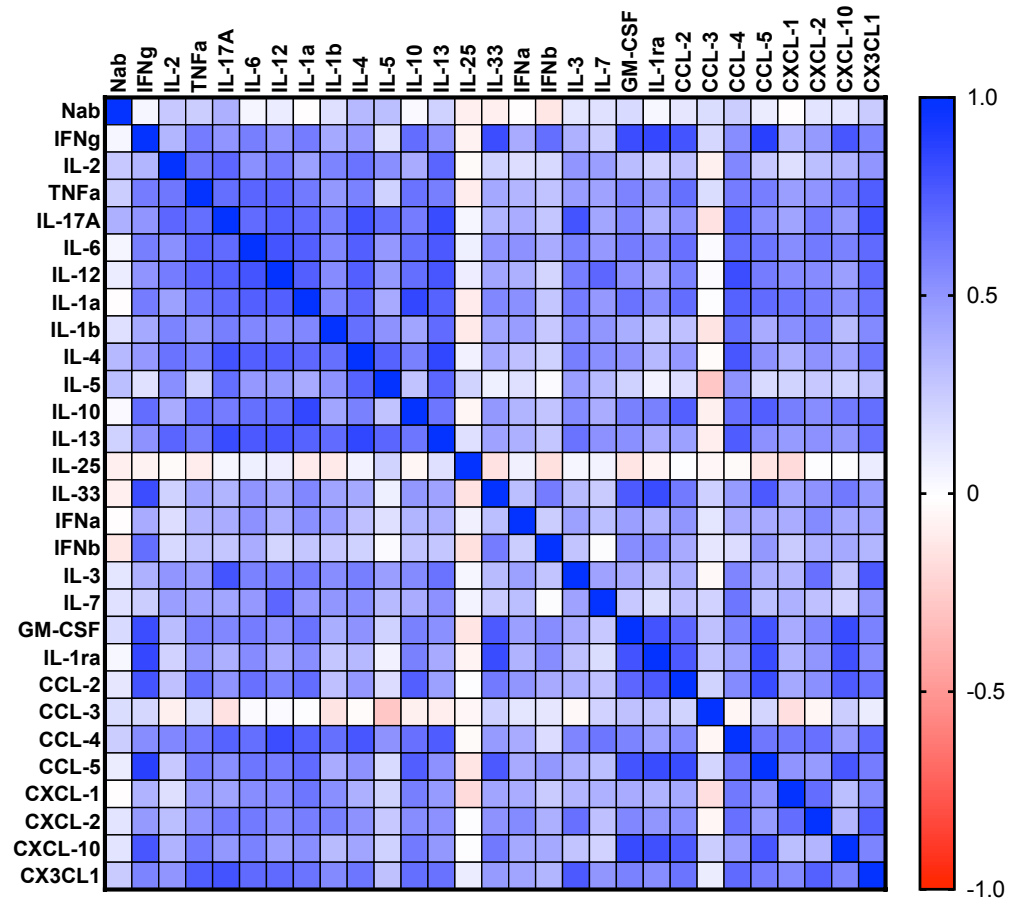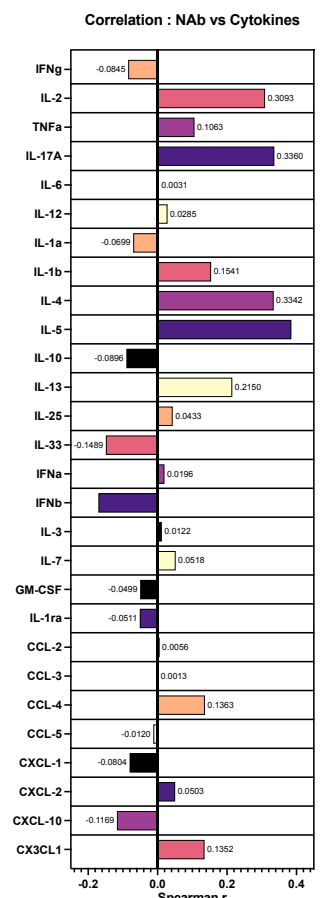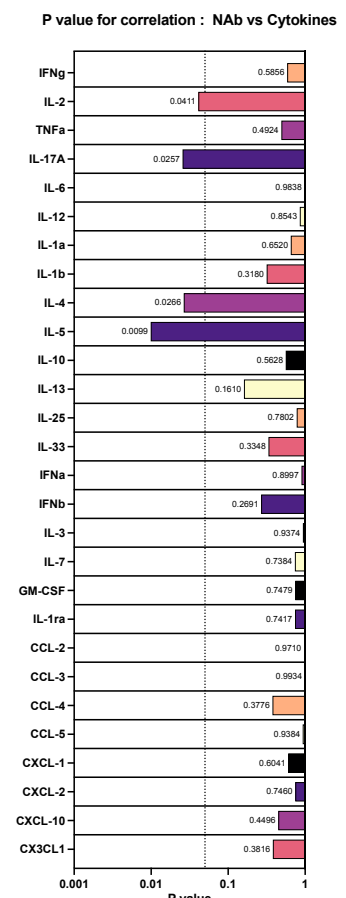

# Sup. Fig. 1B: Month 3 : Nab vs Immune markers

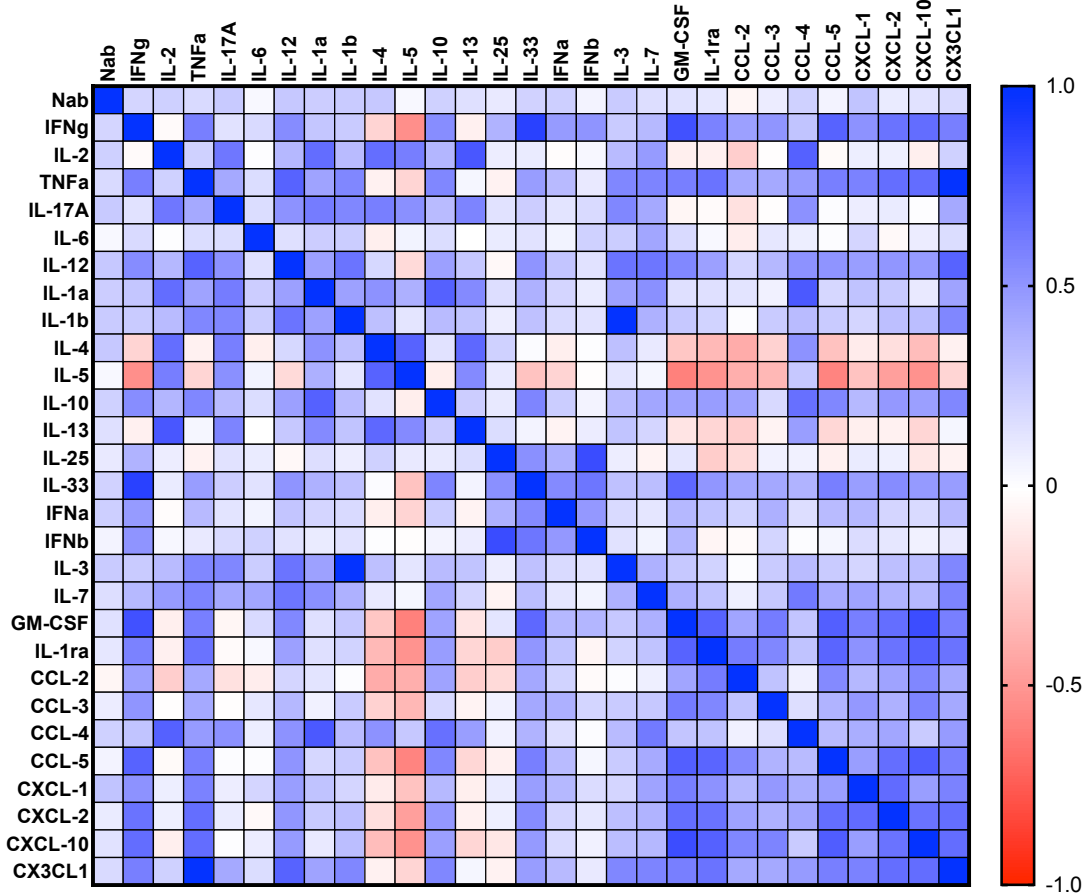

Correlation : NAB vs Cytokines

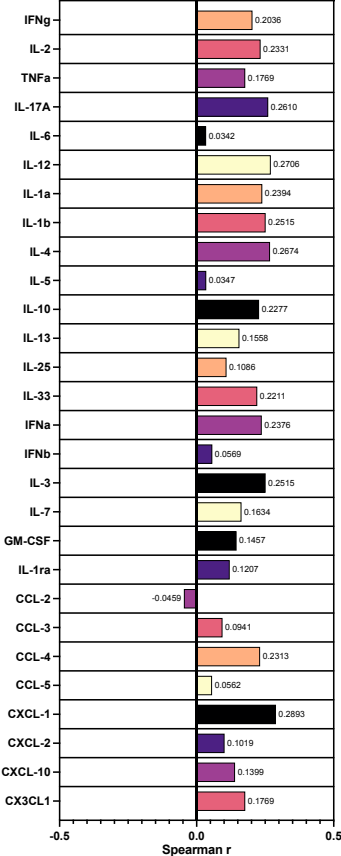

P value for correlation : NAB vs Cytokines

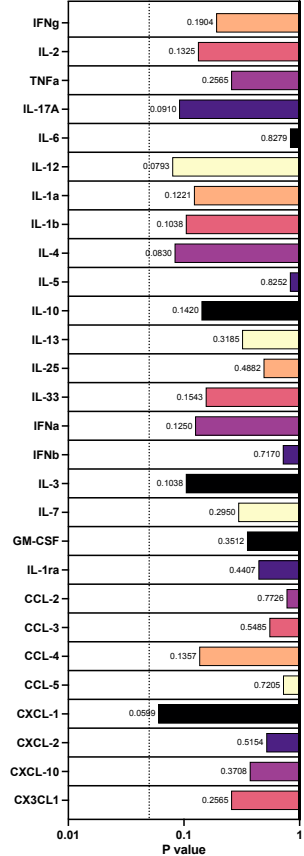

Supplement: DataSheet_1.pdf [file DataSheet_1.pdf]
